# Supplementary material for: Hydrothermal synthesis of α-Fe2O3@SnO2 core–shell nanotubes for highly selective enrichment of phosphopeptides for mass spectrometry analysis
Source: Royal Society of Chemistry journal article supplement (doi:10.1039/c0nr00060d), 2010-01-01
Supplement: c0nr00060d.pdf [file c0nr00060d.pdf]

**Table S1.** Detail information of the phosphopeptides enriched from tryptic digests of rat brain using  $\alpha$ -Fe<sub>2</sub>O<sub>3</sub>@SnO<sub>2</sub> nanotubes

| Index | Peptide Sequence  | MH+     | DeltaM | Charge | Xcorr | DeltaCn | Ions   | pI   | MSn     | Protein Description                                                     | Sp     | RSp |
|-------|-------------------|---------|--------|--------|-------|---------|--------|------|---------|-------------------------------------------------------------------------|--------|-----|
|       | .LQAALDNEAGGRPA   |         |        |        |       |         |        |      |         |                                                                         |        |     |
|       | MEPGNGS#LDL       |         |        |        |       |         |        |      |         | IPI:IPI00210090.3                                                       |        |     |
| 1     | GGDAAGR.          | 3060.38 | -1.238 | 3      | 6.74  | 0.5     | 57/180 | 3.88 | MS2&MS3 | Gene_Symbol=Hnrnpu SP120                                                | 1976.4 | 1   |
|       | .TAKDS#DDDDDDVTV  |         |        |        |       |         |        |      |         | IPI:IPI00324381.5                                                       |        |     |
| 2     | TVDR.             | 1946.79 | -0.367 | 2      | 6.73  | 0.1     | 38/48  | 3.52 | MS2&MS3 | Gene_Symbol=Stx1a Syntaxin-1A                                           | 1862.6 | 1   |
|       | .LLHEDLDES#DDD    |         |        |        |       |         |        |      |         | IPI:IPI00365595.4                                                       |        |     |
| 3     | DEK.              | 1966.78 | -0.479 | 2      | 6.68  | 0.4     | 35/45  | 3.48 | MS2&MS3 | Gene_Symbol=Ddef2 development<br>and differentiation enhancing factor 2 | 2420.7 | 1   |
|       | .TPEELDDSD#DFETED |         |        |        |       |         |        |      |         | IPI:IPI00358406.2                                                       |        |     |
| 4     | FDVR.             | 2238.86 | -1.386 | 2      | 6.64  | 0.2     | 37/51  | 3.19 | MS2&MS3 | Gene_Symbol=Ctnna1 Catenin<br>(Cadherin-associated protein), alpha 1    | 1376.9 | 1   |
|       | .TPEELEDDSD#DFEQE |         |        |        |       |         |        |      |         | IPI:IPI00870129.1                                                       |        |     |
| 5     | DYDVR.            | 2410.91 | -0.437 | 2      | 6.16  | 0.4     | 37/54  | 3.16 | MS2&MS3 | Gene_Symbol=Ctnna2 catenin<br>(cadherin associated protein), alpha 2    | 1413.6 | 1   |
|       | .FGIHVYQFPECDS#D  |         |        |        |       |         |        |      |         | IPI:IPI00201737.1                                                       |        |     |
| 6     | EDEDFKQQR.        | 3084.24 | -0.216 | 3      | 6.04  | 0.3     | 49/138 | 3.82 | MS2&MS3 | Gene_Symbol=Sept5 Isoform 2 of<br>Septin-5                              | 907.3  | 1   |
|       | .GAEEEEEEEDDDSD#E |         |        |        |       |         |        |      |         | IPI:IPI00778976.1                                                       |        |     |
| 7     | EEIK.             | 2190.76 | -0.342 | 2      | 6.02  | 0.4     | 37/51  | 3.14 | MS2&MS3 | Gene_Symbol=Epb4.9 45 kDa<br>protein                                    | 2054.0 | 1   |
|       | .NRDVEMGNS#VIEE   |         |        |        |       |         |        |      |         | IPI:IPI00230956.1                                                       |        |     |
| 8     | NEMK.             | 2073.86 | -1.033 | 2      | 5.50  | 0.4     | 34/48  | 4.05 | MS2&MS3 | Gene_Symbol=Slc1a3 Isoform                                              | 946.6  | 1   |

|    |                   |         |        |   |      |     |        |      |         |                                                                                                                        |        |   |
|----|-------------------|---------|--------|---|------|-----|--------|------|---------|------------------------------------------------------------------------------------------------------------------------|--------|---|
|    | .LSSNCSGVEGDVT#   |         |        |   |      |     |        |      |         | GLAST-1A of Excitatory amino acid transporter 1<br>IPI:IPI00870905.1<br>Gene_Symbol=Plcl2 phospholipase                |        |   |
| 9  | DEDEGAEMSQR.      | 2652.01 | -1.281 | 2 | 5.26 | 0.3 | 37/69  | 3.35 | MS2&MS3 | C-like 2<br>IPI:IPI00358365.3<br>Gene_Symbol=Sgip1 similar to SH3-domain GRB2-like (endophilin) interacting protein 1  | 1133.6 | 1 |
|    | .TGS#PLTVATGNDQ   |         |        |   |      |     |        |      |         | IPI:IPI00365935.3<br>Gene_Symbol=Ptges3 Prostaglandin E synthase 3                                                     |        |   |
| 10 | AATEAK.           | 1911.87 | -0.586 | 2 | 5.12 | 0.2 | 28/54  | 4.11 | MS2&MS3 | E synthase 3<br>IPI:IPI00331966.6<br>Gene_Symbol=Gabbr2<br>Gamma-aminobutyric acid type B receptor subunit 2 precursor | 878.6  | 1 |
|    | .DWEDDS#DEDMSNF   |         |        |   |      |     |        |      |         | IPI:IPI00471584.7<br>Gene_Symbol=Hsp90ab1 Heat shock protein HSP 90-beta                                               | 2399.9 | 1 |
| 11 | DR.               | 1955.63 | -0.758 | 2 | 5.03 | 0.4 | 34/42  | 3.18 | MS2&MS3 | IPI:IPI00360894.4<br>Gene_Symbol=Cadm4 Cell adhesion molecule 4 precursor                                              | 743.3  | 1 |
|    | .TCKDPIEDINS#PEHI |         |        |   |      |     |        |      |         | IPI:IPI00189138.1<br>Gene_Symbol=Nucks1 Nuclear ubiquitous casein and cyclin-dependent kinases substrate               | 1129.3 | 1 |
| 12 | QR.               | 2131.95 | -1.394 | 3 | 4.96 | 0.4 | 40/96  | 4.58 | MS2&MS3 |                                                                                                                        |        |   |
|    | .IEDVGS#DEEDDSGK  |         |        |   |      |     |        |      |         |                                                                                                                        |        |   |
| 13 | DK.               | 1817.70 | -0.382 | 2 | 4.91 | 0.4 | 34/45  | 3.56 | MS2&MS3 |                                                                                                                        |        |   |
|    | .GSYLTHEAS#GLDE   |         |        |   |      |     |        |      |         |                                                                                                                        |        |   |
| 14 | QGEAR.            | 1999.84 | -0.525 | 2 | 4.84 | 0.3 | 35/51  | 4.20 | MS2&MS3 |                                                                                                                        |        |   |
|    | .KVVVDYSQFQES#DD  |         |        |   |      |     |        |      |         |                                                                                                                        |        |   |
| 15 | ADEDYGR.          | 2445.97 | -1.111 | 3 | 4.81 | 0.3 | 39/114 | 3.61 | MS2&MS3 |                                                                                                                        | 1026.8 | 1 |

|    |                   |         |        |   |      |     |        |      |         |                                                                |        |   |
|----|-------------------|---------|--------|---|------|-----|--------|------|---------|----------------------------------------------------------------|--------|---|
|    | .KGAEDEEEEEEDDDDS |         |        |   |      |     |        |      |         | IPI:IPI00778976.1                                              |        |   |
| 16 | #EEEIK.           | 2318.86 | -1.274 | 2 | 4.77 | 0.4 | 30/54  | 3.46 | MS2&MS3 | Gene_Symbol=Epb4.9 45 kDa protein                              | 448.2  | 1 |
|    | .RGGGSGGGDES#EG   |         |        |   |      |     |        |      |         | IPI:IPI00189358.2                                              |        |   |
| 17 | EEVDED.           | 1917.66 | -0.285 | 2 | 4.68 | 0.3 | 34/54  | 3.30 | MS2&MS3 | Gene_Symbol=Purb Transcriptional activator protein Pur-beta    | 1198.6 | 1 |
|    | .WLDES#DAEMELR.   |         |        |   |      |     |        |      |         | IPI:IPI00766722.1                                              |        |   |
| 18 | .WLDES#DAEMELR.   | 1573.62 | -1.178 | 2 | 4.58 | 0.4 | 28/33  | 3.54 | MS2&MS3 | Gene_Symbol=LOC688570 similar to butyrate-induced transcript 1 | 1800.0 | 1 |
|    | .AKEEQELQDIQS#R.  |         |        |   |      |     |        |      |         | IPI:IPI00206643.2                                              |        |   |
| 19 | .AKEEQELQDIQS#R.  | 1653.75 | -1.155 | 3 | 4.51 | 0.2 | 31/72  | 4.21 | MS2&MS3 | Gene_Symbol=Gpm6b 36 kDa protein                               | 1472.9 | 2 |
|    | .IQQFDDGGS#DEEDI  |         |        |   |      |     |        |      |         | IPI:IPI00766645.2                                              |        |   |
| 20 | WEEK.             | 2219.87 | -0.668 | 2 | 4.39 | 0.3 | 30/51  | 3.26 | MS2&MS3 | Gene_Symbol=Saps3 similar to SAPS domain family, member 3      | 717.5  | 1 |
|    | .KAEGEPQEES#PLKS  |         |        |   |      |     |        |      |         | IPI:IPI00382244.1                                              |        |   |
| 21 | K.                | 1736.81 | -1.224 | 3 | 4.30 | 0.2 | 41/84  | 4.78 | MS2&MS3 | Gene_Symbol=Bclaf1 Aa2-041                                     | 978.0  | 1 |
|    | .EDAPPEDKESESEA   |         |        |   |      |     |        |      |         | IPI:IPI00208200.2                                              |        |   |
| 22 | KLDGET#ASDSESR.   | 2988.21 | -0.808 | 3 | 4.25 | 0.2 | 50/156 | 3.72 | MS2&MS3 | Gene_Symbol=Cds2 Phosphatidate cytidyltransferase 2            | 821.5  | 2 |
|    | .DDEKEPEEGEDDRD   |         |        |   |      |     |        |      |         | IPI:IPI00187860.3                                              |        |   |
| 23 | S#ANGEDDS.        | 2532.86 | -0.840 | 3 | 4.21 | 0.4 | 39/126 | 3.33 | MS2&MS3 | Gene_Symbol=Hnrnpc Heterogeneous nuclear ribonucleoprotein C   | 753.3  | 1 |
|    | .KGAEDEEEEEEDDDDS |         |        |   |      |     |        |      |         | IPI:IPI00778976.1                                              |        |   |
| 24 | #EEEIK.           | 2318.86 | -0.282 | 2 | 4.03 | 0.2 | 28/54  | 3.46 | MS2&MS3 | Gene_Symbol=Epb4.9 45 kDa                                      | 430.4  | 2 |

|    |                   |         |        |   |      |     |       |      |         |                                    |        |   |
|----|-------------------|---------|--------|---|------|-----|-------|------|---------|------------------------------------|--------|---|
|    |                   |         |        |   |      |     |       |      |         | protein                            |        |   |
|    |                   |         |        |   |      |     |       |      |         | IPI:IPI00199693.2                  |        |   |
|    |                   |         |        |   |      |     |       |      |         | Gene_Symbol=Mtap1a                 |        |   |
| 25 | TGQR.             | 2120.97 | -0.905 | 2 | 3.96 | 0.2 | 22/54 | 4.31 | MS2&MS3 | Microtubule-associated protein 1A  | 615.9  | 1 |
|    |                   |         |        |   |      |     |       |      |         | IPI:IPI00204503.1                  |        |   |
|    |                   |         |        |   |      |     |       |      |         | Gene_Symbol=Epb4.113 Type II       |        |   |
| 26 | TK.               | 1606.70 | 0.532  | 2 | 3.77 | 0.3 | 24/42 | 4.11 | MS2&MS3 | brain 4.1 minor isoform            | 858.8  | 1 |
|    |                   |         |        |   |      |     |       |      |         | IPI:IPI00471640.1                  |        |   |
|    |                   |         |        |   |      |     |       |      |         | Gene_Symbol=Leo1 RNA               |        |   |
| 27 | .KYVIS#DEEEEEEDD. | 1679.62 | -1.076 | 2 | 3.60 | 0.3 | 20/36 | 3.30 | MS2&MS3 | polymerase-associated protein LEO1 | 660.7  | 1 |
|    |                   |         |        |   |      |     |       |      |         | IPI:IPI00778626.1                  |        |   |
| 28 | S#PSSSETVR.       | 2657.13 | -0.904 | 2 | 3.48 | 0.1 | 21/69 | 3.62 | MS2&MS3 | Gene_Symbol=Ania4 84 kDa protein   | 376.1  | 1 |
|    |                   |         |        |   |      |     |       |      |         | IPI:IPI00208115.4                  |        |   |
|    |                   |         |        |   |      |     |       |      |         | Gene_Symbol=Sv2a Synaptic vesicle  |        |   |
| 29 | .GGLS#DGEGPPGGR.  | 1235.51 | -0.648 | 2 | 3.38 | 0.3 | 31/36 | 4.11 | MS2&MS3 | glycoprotein 2A                    | 1148.2 | 1 |
|    |                   |         |        |   |      |     |       |      |         | IPI:IPI00203530.5                  |        |   |
|    |                   |         |        |   |      |     |       |      |         | Gene_Symbol=Cdh10 similar to       |        |   |
| 30 | A.                | 1522.58 | -0.560 | 2 | 3.37 | 0.2 | 26/39 | 3.63 | MS2&MS3 | cadherin 10, type 2 preproprotein  | 789.4  | 1 |
|    |                   |         |        |   |      |     |       |      |         | isoform 3                          |        |   |
|    |                   |         |        |   |      |     |       |      |         | IPI:IPI00201213.3                  |        |   |
|    |                   |         |        |   |      |     |       |      |         | Gene_Symbol=LOC501546              |        |   |
| 31 | R.                | 1577.61 | -0.698 | 2 | 3.31 | 0.2 | 24/39 | 3.62 | MS2&MS3 | LOC501546 protein                  | 560.4  | 1 |
|    |                   |         |        |   |      |     |       |      |         | IPI:IPI00554111.2                  |        |   |
|    |                   |         |        |   |      |     |       |      |         | Gene_Symbol=Ank2 similar to        |        |   |
| 32 | .ARS#YIETETESR.   | 1521.66 | -0.459 | 2 | 3.19 | 0.2 | 22/33 | 4.60 | MS2&MS3 | ankyrin 2 isoform 1                | 381.4  | 1 |
| 33 | .DSGSSSVFAES#PGG  | 1491.60 | -0.563 | 2 | 3.17 | 0.3 | 29/42 | 4.11 | MS2&MS3 | IPI:IPI00190619.3                  | 636.3  | 1 |

|    |                                                                      |         |        |   |      |     |        |      |     |                                                                                                                                                                                                       |        |   |
|----|----------------------------------------------------------------------|---------|--------|---|------|-----|--------|------|-----|-------------------------------------------------------------------------------------------------------------------------------------------------------------------------------------------------------|--------|---|
|    | K.                                                                   |         |        |   |      |     |        |      |     | Gene_Symbol=Snip 135 kDa protein<br>IPI:IPI00367933.4                                                                                                                                                 |        |   |
|    | .ARPSQLPEQSSSAQQ                                                     |         |        |   |      |     |        |      |     | Gene_Symbol=Kif2a Isoform 2 of<br>Kinesin-like protein KIF2A                                                                                                                                          | 2308.9 | 1 |
| 34 | NGSVSDIS#PVQAAK.<br>.CGSGP VHISGQHLV<br>AVEEDAES#EDEDEE              | 3047.44 | -1.476 | 3 | 7.78 | 0.1 | 53/168 | 7.12 | MS2 | IPI:IPI00197553.1<br>Gene_Symbol=Npm1 Isoform B23.1<br>of Nucleophosmin                                                                                                                               | 807.1  | 1 |
| 35 | DVK.<br>.TDSERTDTAADGET<br>SATES#DQEEDAELK                           | 3446.42 | -1.340 | 3 | 7.30 | 0.4 | 49/180 | 3.71 | MS2 | IPI:IPI00204503.1<br>Gene_Symbol=Epb4.113 Type II<br>brain 4.1 minor isoform                                                                                                                          | 1189.1 | 2 |
| 36 | .                                                                    | 3081.22 | -1.151 | 3 | 7.06 | 0.1 | 48/162 | 3.45 | MS2 | IPI:IPI00204923.4<br>Gene_Symbol=Usp9x similar to<br>Probable ubiquitin carboxyl-terminal<br>hydrolase FAF-X (Ubiquitin<br>thioesterase FAF-X)<br>(Ubiquitin-specific-processing<br>protease FAF-X) ( | 1240.3 | 1 |
| 37 | .NGILAIEGTGSDVDD<br>DMS#GDEKQDNESN<br>VDPR.                          | 3472.43 | -1.592 | 3 | 6.98 | 0.1 | 52/186 | 3.41 | MS2 | IPI:IPI00213940.3<br>Gene_Symbol=Fam131b Protein<br>FAM131B                                                                                                                                           | 1971.4 | 1 |
| 38 | .KVS#DVTSSGVQSF<br>DEEEGDANN.<br>.GSAES#PDEGITTTE<br>GEGECEQTPEELEPV | 2393.96 | -0.818 | 2 | 6.88 | 0.2 | 35/63  | 3.40 | MS2 | IPI:IPI00372009.3<br>Gene_Symbol=Map1b<br>microtubule-associated protein 1b                                                                                                                           | 1525.4 | 1 |
| 39 | EK.<br>.NLLEDDS#DEEEDFF<br>LR.                                       | 3414.39 | -1.655 | 3 | 6.41 | 0.1 | 51/180 | 3.28 | MS2 | IPI:IPI00358945.2<br>Gene_Symbol=Vamp4 16 kDa<br>protein                                                                                                                                              | 3084.2 | 1 |
| 40 |                                                                      | 2065.83 | -0.560 | 2 | 6.39 | 0.4 | 38/45  | 3.26 | MS2 |                                                                                                                                                                                                       |        |   |

|    |                  |         |        |   |      |     |        |      |     |                                                                  |        |   |
|----|------------------|---------|--------|---|------|-----|--------|------|-----|------------------------------------------------------------------|--------|---|
|    | .VSEEAESQQWDTSK  |         |        |   |      |     |        |      |     | IPI:IPI00373419.2                                                |        |   |
|    | GDQVSQNGLPAEQG   |         |        |   |      |     |        |      |     | Gene_Symbol=Spnb2                                                |        |   |
| 41 | S#PR.            | 3424.49 | -1.388 | 3 | 6.25 | 0.4 | 56/180 | 3.86 | MS2 | Non-erythrocyte beta-spectrin                                    | 1569.8 | 1 |
|    | .EYVSN DAT#QSDDE |         |        |   |      |     |        |      |     | IPI:IPI00205633.8                                                |        |   |
| 42 | EKLQSQTDTDGGR.   | 3096.25 | -1.561 | 3 | 6.07 | 0.1 | 47/156 | 3.56 | MS2 | Gene_Symbol=Wdr44 99 kDa protein                                 | 1340.5 | 2 |
|    | .KLSSNCSGVEGDVT  |         |        |   |      |     |        |      |     | IPI:IPI00870905.1                                                |        |   |
| 43 | #DEDEGAEMSQR.    | 2780.10 | -1.284 | 3 | 5.92 | 0.2 | 49/144 | 3.72 | MS2 | Gene_Symbol=Plcl2 phospholipase<br>C-like 2                      | 1365.7 | 1 |
|    | .KLPSESDLLEGEVT# |         |        |   |      |     |        |      |     | IPI:IPI00207181.1                                                |        |   |
| 44 | DEDEEAEMSR.      | 2788.18 | -0.225 | 3 | 5.87 | 0.4 | 47/138 | 3.57 | MS2 | Gene_Symbol=Plcl1 Inactive<br>phospholipase C-like protein 1     | 1330.6 | 1 |
|    | .AQKENS#MEEPEEM  |         |        |   |      |     |        |      |     | IPI:IPI00190687.2                                                |        |   |
|    | DSQDAETTNTTEPM   |         |        |   |      |     |        |      |     | Gene_Symbol=Vcpip1                                               |        |   |
| 45 | DHS.             | 3491.31 | -1.536 | 3 | 5.85 | 0.4 | 51/174 | 3.57 | MS2 | Deubiquitinating protein VCIP135                                 | 1520.7 | 1 |
|    | .DVMSDETNN EETES |         |        |   |      |     |        |      |     | IPI:IPI00372009.3                                                |        |   |
| 46 | #PSQEFVNITK.     | 2823.16 | -0.469 | 3 | 5.78 | 0.1 | 52/138 | 3.41 | MS2 | Gene_Symbol=Map1b<br>microtubule-associated protein 1b           | 2863.8 | 1 |
|    | .S#LDSDESEDEDDD  |         |        |   |      |     |        |      |     | IPI:IPI00208277.1                                                |        |   |
| 47 | YQQK.            | 2097.73 | -0.295 | 2 | 5.75 | 0.2 | 30/48  | 3.15 | MS2 | Gene_Symbol=Pdap1 28 kDa heat-<br>and acid-stable phosphoprotein | 813.6  | 1 |
|    | .DWEDDS#DEDMSNF  |         |        |   |      |     |        |      |     | IPI:IPI00365935.3                                                |        |   |
| 48 | DR.              | 1955.63 | -0.599 | 2 | 5.61 | 0.4 | 33/42  | 3.18 | MS2 | Gene_Symbol=Ptges3 Prostaglandin<br>E synthase 3                 | 2363.4 | 1 |
|    | .EEAS#DDDMEGDEA  |         |        |   |      |     |        |      |     | IPI:IPI00373118.2                                                |        |   |
| 49 | VVR.             | 1846.67 | 0.118  | 2 | 5.58 | 0.3 | 33/45  | 3.26 | MS2 | Gene_Symbol=Ascc311 79 kDa<br>protein                            | 2175.8 | 1 |

|    |                  |         |        |   |      |     |        |      |     |                                                                                           |        |    |
|----|------------------|---------|--------|---|------|-----|--------|------|-----|-------------------------------------------------------------------------------------------|--------|----|
|    | .GVVTNGLDVS#PAE  |         |        |   |      |     |        |      |     | IPI:IPI00325609.4                                                                         |        |    |
| 50 | EK.              | 1594.74 | -1.526 | 2 | 5.56 | 0.4 | 35/42  | 3.87 | MS2 | Gene_Symbol=Nefm Neurofilament<br>medium polypeptide                                      | 2398.0 | 1  |
|    | .KGTGDCS#DEEVDG  |         |        |   |      |     |        |      |     | IPI:IPI00209113.3                                                                         |        |    |
| 51 | KADGADAK.        | 2204.86 | -1.149 | 3 | 5.44 | 0.1 | 41/120 | 3.89 | MS2 | Gene_Symbol=Myh9 Myosin-9                                                                 | 956.4  | 1  |
|    | .VVDYSQFQES#DDA  |         |        |   |      |     |        |      |     | IPI:IPI00189138.1                                                                         |        |    |
| 52 | DEDYGR.          | 2317.88 | -0.277 | 2 | 5.43 | 0.3 | 32/54  | 3.25 | MS2 | Gene_Symbol=Nucks1 Nuclear<br>ubiquitous casein and<br>cyclin-dependent kinases substrate | 991.6  | 1  |
|    | .SKSDNSSHPQKDDG  |         |        |   |      |     |        |      |     | IPI:IPI00189818.1                                                                         |        |    |
|    | DNPET#IMSSGNVNS  |         |        |   |      |     |        |      |     | Gene_Symbol=Edg1 Sphingosine<br>1-phosphate receptor Edg-1                                | 437.4  | 15 |
| 53 | SS.              | 3201.29 | -0.433 | 3 | 5.42 | 0.2 | 44/174 | 4.16 | MS2 | IPI:IPI00192337.1                                                                         |        |    |
|    | .AGAYDFPS#PEWDT  |         |        |   |      |     |        |      |     | Gene_Symbol=Camk2a<br>Calcium/calmodulin-dependent<br>protein kinase type II alpha chain  | 1453.1 | 1  |
| 54 | VTPEAK.          | 2160.92 | -1.966 | 2 | 5.41 | 0.1 | 30/54  | 3.62 | MS2 | IPI:IPI00191730.1                                                                         |        |    |
|    | .SAKDS#DDEEEVVH  |         |        |   |      |     |        |      |     | Gene_Symbol=Stx1b Syntaxin-1B                                                             | 1137.7 | 1  |
| 55 | VDR.             | 1909.78 | -0.965 | 3 | 5.38 | 0.2 | 42/90  | 3.94 | MS2 | IPI:IPI00209527.3                                                                         |        |    |
|    | .SLAALDALNT#DDE  |         |        |   |      |     |        |      |     | Gene_Symbol=Mfap1a similar to<br>microfibrillar-associated protein 1                      | 1112.2 | 1  |
| 56 | NDEEEYEAWK.      | 2721.11 | -1.631 | 2 | 5.37 | 0.2 | 32/66  | 3.23 | MS2 | IPI:IPI00764370.1                                                                         |        |    |
|    | .AES#PETSVESTQS  |         |        |   |      |     |        |      |     | Gene_Symbol=Pds5b PDS5,<br>regulator of cohesion maintenance,<br>homolog B isoform 1      | 1441.0 | 1  |
| 57 | TPQK.            | 1956.84 | -0.701 | 2 | 5.30 | 0.2 | 32/51  | 4.01 | MS2 |                                                                                           |        |    |
| 58 | .VDNSSLTGESEPQTR | 3200.40 | -0.942 | 3 | 5.23 | 0.1 | 45/162 | 3.86 | MS2 | IPI:IPI00326305.3                                                                         | 951.6  | 1  |

|    |                                      |         |        |   |      |     |        |      |     |                                                                                                              |        |   |
|----|--------------------------------------|---------|--------|---|------|-----|--------|------|-----|--------------------------------------------------------------------------------------------------------------|--------|---|
|    | S#PDFTNENPLETR.                      |         |        |   |      |     |        |      |     | Gene_Symbol=Atp1a1<br>Sodium/potassium-transporting<br>ATPase subunit alpha-1 precursor<br>IPI:IPI00779470.1 |        |   |
|    | .KETES#EAEDDNL                       |         |        |   |      |     |        |      |     | Gene_Symbol=Srrm1 106 kDa<br>protein<br>IPI:IPI00870224.1                                                    |        |   |
| 59 | DLER.                                | 2087.83 | -0.005 | 2 | 5.17 | 0.1 | 28/48  | 3.56 | MS2 |                                                                                                              | 479.8  | 1 |
|    | .GDMS#DEDDENEFF                      |         |        |   |      |     |        |      |     | Gene_Symbol=Osbp oxysterol<br>binding protein<br>IPI:IPI00565773.1                                           |        |   |
| 60 | DAPEIITMPENLGHK.<br>.VARPQILEPRPQS#P | 3275.31 | -1.316 | 3 | 5.15 | 0.4 | 40/162 | 3.48 | MS2 |                                                                                                              | 816.0  | 1 |
| 61 | DLCDDVVEFR.                          | 2932.37 | -0.861 | 3 | 5.13 | 0.5 | 52/138 | 4.04 | MS2 | Gene_Symbol=Sept4 55 kDa protein<br>IPI:IPI00417225.1                                                        | 1390.7 | 1 |
|    | .VAS#EEEEVPLVY                       |         |        |   |      |     |        |      |     | Gene_Symbol=Synpo Isoform 1 of<br>Synaptopodin<br>IPI:IPI00365929.1                                          |        |   |
| 62 | LK.                                  | 1783.88 | -0.915 | 2 | 5.08 | 0.5 | 30/42  | 3.84 | MS2 |                                                                                                              | 1479.9 | 1 |
|    | .DGELPVEDDIDLS#D                     |         |        |   |      |     |        |      |     | Gene_Symbol=Pdia6 protein<br>disulfide isomerase associated 6<br>IPI:IPI00476991.1                           |        |   |
| 63 | VELDDLEKDEL.                         | 2910.26 | -1.500 | 2 | 4.99 | 0.5 | 30/72  | 3.01 | MS2 |                                                                                                              | 1003.1 | 1 |
|    | .AAFSDDES#KEPIVE                     |         |        |   |      |     |        |      |     | Gene_Symbol=Ncam1 Neural cell<br>adhesion molecule 1, 140 kDa<br>isoform precursor<br>IPI:IPI00188804.1      |        |   |
| 64 | VR.                                  | 1884.91 | 0.127  | 2 | 4.96 | 0.2 | 27/45  | 4.70 | MS2 |                                                                                                              | 346.2  | 1 |
|    | .KEESEES#DDDMGF                      |         |        |   |      |     |        |      |     | Gene_Symbol=Rplp2 60S acidic<br>ribosomal protein P2<br>IPI:IPI00373419.2                                    |        |   |
| 65 | GLFD.<br>.GDQVSQNGLPAEQG             | 2029.73 | -0.035 | 2 | 4.88 | 0.1 | 29/48  | 3.25 | MS2 |                                                                                                              | 1181.8 | 1 |
| 66 | S#PR.                                | 1819.80 | -1.279 | 2 | 4.87 | 0.3 | 27/48  | 4.11 | MS2 | Gene_Symbol=Spnb2                                                                                            | 547.2  | 1 |



|    |                            |         |        |   |      |     |        |      |     |                                                                                                                                                 |        |   |
|----|----------------------------|---------|--------|---|------|-----|--------|------|-----|-------------------------------------------------------------------------------------------------------------------------------------------------|--------|---|
|    |                            |         |        |   |      |     |        |      |     | Non-erythrocyte beta-spectrin<br>IPI:IPI00189138.1<br>Gene_Symbol=Nucks1 Nuclear<br>ubiquitous casein and<br>cyclin-dependent kinases substrate | 1122.8 | 1 |
| 67 | .TPSPKEEDEEAES#P<br>PEKK.  | 2106.91 | -1.006 | 3 | 4.85 | 0.4 | 46/102 | 4.12 | MS2 | IPI:IPI00324381.5                                                                                                                               |        |   |
| 68 | .TAKDS#DDDDVTV<br>TVDRDR.  | 2217.91 | 0.049  | 3 | 4.81 | 0.2 | 43/108 | 3.69 | MS2 | Gene_Symbol=Stx1a Syntaxin-1A<br>IPI:IPI00209590.2                                                                                              | 1158.2 | 1 |
| 69 | .LTSIGS#DEDEETET<br>YQEK.  | 2153.86 | -1.577 | 2 | 4.77 | 0.1 | 28/51  | 3.41 | MS2 | Gene_Symbol=Slc12a6 solute carrier<br>family 12, member 6<br>IPI:IPI00208277.1                                                                  | 699.5  | 1 |
| 70 | .SLDSDES#EDED<br>YQK.      | 2097.73 | -0.351 | 2 | 4.67 | 0.5 | 28/48  | 3.15 | MS2 | Gene_Symbol=Pdap1 28 kDa heat-<br>and acid-stable phosphoprotein<br>IPI:IPI00324893.4                                                           | 620.7  | 2 |
| 71 | .TAFDEAIAELDTLS#<br>EESYK. | 2211.96 | -1.181 | 2 | 4.67 | 0.1 | 28/54  | 3.47 | MS2 | Gene_Symbol=Ywhaz 14-3-3 protein<br>zeta/delta<br>IPI:IPI00476178.3                                                                             | 1218.9 | 1 |
| 72 | .ESLKEEDS#DDDN<br>M.       | 1735.59 | -0.575 | 2 | 4.59 | 0.4 | 24/39  | 3.25 | MS2 | Gene_Symbol=Psma31;Psma3<br>Proteasome subunit alpha type-3<br>IPI:IPI00206643.2                                                                | 444.2  | 1 |
| 73 | .AKEEQELQDIQS#R.<br>.      | 1653.75 | -0.689 | 3 | 4.55 | 0.2 | 34/72  | 4.21 | MS2 | Gene_Symbol=Gpm6b 36 kDa<br>protein<br>IPI:IPI00210635.2                                                                                        | 1828.8 | 1 |
| 74 | .FLALMREEGAS#PL<br>DFD.    | 1890.83 | -0.687 | 2 | 4.52 | 0.4 | 32/45  | 3.62 | MS2 | Gene_Symbol=Nsf Vesicle-fusing<br>ATPase                                                                                                        | 1695.1 | 1 |
| 75 | .LENEGS#DEDIETDV<br>.      | 2676.16 | -1.008 | 2 | 4.36 | 0.4 | 27/66  | 3.35 | MS2 | IPI:IPI00208152.2                                                                                                                               | 893.3  | 1 |

|    |                     |         |        |   |      |     |        |      |     |                                                                                                                                                                               |        |   |
|----|---------------------|---------|--------|---|------|-----|--------|------|-----|-------------------------------------------------------------------------------------------------------------------------------------------------------------------------------|--------|---|
|    | LYSPQMALK.          |         |        |   |      |     |        |      |     | Gene_Symbol=Mgea5 Isoform 1 of Bifunctional protein NCOAT<br>IPI:IPI00778976.1                                                                                                |        |   |
|    | .KGAEIIIIIIIIEDDSDS |         |        |   |      |     |        |      |     | Gene_Symbol=Epb4.9 45 kDa protein<br>IPI:IPI00392493.3                                                                                                                        |        |   |
| 76 | #EEEIK.             | 2318.86 | -1.420 | 3 | 4.34 | 0.3 | 39/108 | 3.46 | MS2 |                                                                                                                                                                               | 1399.3 | 1 |
|    | .NCPS#PMQTGAATD     |         |        |   |      |     |        |      |     | Gene_Symbol=Elav14 similar to ELAV-like 4 isoform 5<br>IPI:IPI00876619.1                                                                                                      |        |   |
| 77 | DSK.                | 1759.67 | -0.294 | 2 | 4.34 | 0.1 | 28/45  | 3.92 | MS2 |                                                                                                                                                                               | 985.8  | 1 |
|    | .FKTQPVTDFDEIQEVE   |         |        |   |      |     |        |      |     | Gene_Symbol=RGD1564664 Protein Ag2<br>IPI:IPI00208699.1                                                                                                                       |        |   |
| 78 | EEGVS#PMEEEK.       | 3134.38 | -1.255 | 3 | 4.32 | 0.3 | 35/150 | 3.71 | MS2 |                                                                                                                                                                               | 384.0  | 1 |
|    | .DQNLQPQILEESRS#E.  |         |        |   |      |     |        |      |     | Gene_Symbol=Cntnap1 Contactin-associated protein 1 precursor<br>IPI:IPI00558210.3 Gene_Symbol=-similar to transcription elongation factor A (SII)-like 5<br>IPI:IPI00207657.1 |        |   |
| 79 | .DQNLQPQILEESRS#E.  | 1737.77 | -0.699 | 2 | 4.32 | 0.1 | 27/39  | 3.72 | MS2 |                                                                                                                                                                               | 1243.2 | 1 |
|    | .GTDDDS#PKNSQEDL    |         |        |   |      |     |        |      |     | Gene_Symbol=Usp5 ubiquitin specific peptidase 5<br>IPI:IPI00202703.4                                                                                                          |        |   |
| 80 | QDR.                | 1884.76 | 0.693  | 3 | 4.31 | 0.1 | 45/90  | 3.80 | MS2 |                                                                                                                                                                               | 1691.5 | 1 |
|    | .GTGLQPGEELPDIA     |         |        |   |      |     |        |      |     | Gene_Symbol=Ostf1 Osteoclast-stimulating factor 1<br>IPI:IPI00188804.1                                                                                                        |        |   |
| 81 | PPLVT#PDEPK.        | 2679.28 | -0.806 | 2 | 4.30 | 0.5 | 26/72  | 3.47 | MS2 |                                                                                                                                                                               | 956.1  | 1 |
|    | .TLSNAEDYLDDSDS     |         |        |   |      |     |        |      |     | Gene_Symbol=Rplp2 60S acidic                                                                                                                                                  |        |   |
| 82 | #D.                 | 1781.63 | -0.917 | 2 | 4.30 | 0.3 | 25/42  | 2.56 | MS2 |                                                                                                                                                                               | 963.7  | 1 |
|    | .KEES#EESDDDMGF     |         |        |   |      |     |        |      |     |                                                                                                                                                                               |        |   |
| 83 | GLFD.               | 2029.73 | -0.344 | 2 | 4.27 | 0.1 | 27/48  | 3.25 | MS2 |                                                                                                                                                                               | 1044.5 | 1 |

|    |                   |         |        |   |      |     |        |       |     |                                                                |        |    |
|----|-------------------|---------|--------|---|------|-----|--------|-------|-----|----------------------------------------------------------------|--------|----|
|    | .ESDDKPEIEDVGS#D  |         |        |   |      |     |        |       |     | ribosomal protein P2                                           |        |    |
|    |                   |         |        |   |      |     |        |       |     | IPI:IPI00210566.3                                              |        |    |
|    |                   |         |        |   |      |     |        |       |     | Gene_Symbol=Hsp90aa1 Heat shock                                |        |    |
| 84 | EEEEEEK.          | 2516.01 | -1.636 | 3 | 4.27 | 0.4 | 44/120 | 3.68  | MS2 | protein HSP 90-alpha                                           | 1078.6 | 1  |
|    |                   |         |        |   |      |     |        |       |     | IPI:IPI00325912.1                                              |        |    |
|    | .RTS#MGGTQQQFVE   |         |        |   |      |     |        |       |     | Gene_Symbol=Ctnnb1 Catenin                                     |        |    |
| 85 | GVR.              | 1860.84 | -0.951 | 2 | 4.27 | 0.1 | 21/45  | 10.60 | MS2 | beta-1                                                         | 185.6  | 16 |
|    | .AEAKEESEES#DED   |         |        |   |      |     |        |       |     | IPI:IPI00561389.2 Gene_Symbol=-                                |        |    |
| 86 | MGFGLFD.          | 2314.86 | -0.814 | 2 | 4.24 | 0.3 | 32/57  | 3.26  | MS2 | 32 kDa protein                                                 | 1047.2 | 1  |
|    | .IYHLPDAES#DEDED  |         |        |   |      |     |        |       |     | IPI:IPI00208304.1                                              |        |    |
| 87 | FKEQTR.           | 2517.05 | -1.226 | 3 | 4.23 | 0.4 | 42/114 | 3.87  | MS2 | Gene_Symbol=Sept2 Septin-2                                     | 872.7  | 1  |
|    |                   |         |        |   |      |     |        |       |     | IPI:IPI00213940.3                                              |        |    |
|    | .KVSDVTSSGVQS#F   |         |        |   |      |     |        |       |     | Gene_Symbol=Fam131b Protein                                    |        |    |
| 88 | DEEEGDANN.        | 2393.96 | -0.265 | 2 | 4.21 | 0.1 | 27/63  | 3.40  | MS2 | FAM131B                                                        | 628.1  | 1  |
|    | .GS#SQPNLSTSYSEQ  |         |        |   |      |     |        |       |     | IPI:IPI00209348.2                                              |        |    |
| 89 | EYGK.             | 2041.84 | -0.534 | 2 | 4.18 | 0.4 | 25/51  | 4.31  | MS2 | Gene_Symbol=Epn2 Epsin-2                                       | 770.7  | 1  |
|    |                   |         |        |   |      |     |        |       |     | IPI:IPI00325912.1                                              |        |    |
|    | .RTS#MGGTQQQFVE   |         |        |   |      |     |        |       |     | Gene_Symbol=Ctnnb1 Catenin                                     |        |    |
| 90 | GVR.              | 1860.84 | -1.051 | 2 | 4.17 | 0.1 | 25/45  | 10.60 | MS2 | beta-1                                                         | 323.9  | 1  |
|    |                   |         |        |   |      |     |        |       |     | IPI:IPI00331966.6                                              |        |    |
|    | .TCKDPIEDINS#PEHI |         |        |   |      |     |        |       |     | Gene_Symbol=Gabbr2                                             |        |    |
| 91 | QR.               | 2131.95 | -1.260 | 3 | 4.17 | 0.3 | 36/96  | 4.58  | MS2 | Gamma-aminobutyric acid type B<br>receptor subunit 2 precursor | 543.3  | 2  |
|    | .MNVPETMNEVLDM    |         |        |   |      |     |        |       |     |                                                                |        |    |
|    | S#DDEGEDAITGDTD   |         |        |   |      |     |        |       |     | IPI:IPI00389129.3                                              |        |    |
| 92 | K.                | 3151.23 | -1.631 | 3 | 4.07 | 0.2 | 40/162 | 3.12  | MS2 | Gene_Symbol=Ank3 Ankyrin G197                                  | 630.8  | 1  |

|    |                  |         |        |   |      |     |       |      |     |                                        |       |   |
|----|------------------|---------|--------|---|------|-----|-------|------|-----|----------------------------------------|-------|---|
|    | .GSLPPAALES#SDST |         |        |   |      |     |       |      |     | IPI:IPI00326171.2                      |       |   |
|    |                  |         |        |   |      |     |       |      |     | Gene_Symbol=Camk2b                     |       |   |
|    |                  |         |        |   |      |     |       |      |     | calcium/calmodulin-dependent           |       |   |
|    |                  |         |        |   |      |     |       |      |     | protein kinase II beta subunit isoform |       |   |
| 93 | NTTIEDEDAK.      | 2528.09 | -0.347 | 2 | 4.07 | 0.1 | 22/69 | 3.40 | MS2 | 1                                      | 304.4 | 4 |
|    | .IEDVGS#DEEDDSGK |         |        |   |      |     |       |      |     | IPI:IPI00471584.7                      |       |   |
|    |                  |         |        |   |      |     |       |      |     | Gene_Symbol=Hsp90ab1 Heat shock        |       |   |
|    |                  |         |        |   |      |     |       |      |     | protein HSP 90-beta                    | 883.9 | 2 |
| 94 | DKK.             | 1945.79 | -1.335 | 3 | 4.06 | 0.2 | 37/96 | 3.82 | MS2 |                                        |       |   |
|    | .KPGNNEGSGAPS#PL |         |        |   |      |     |       |      |     | IPI:IPI00215134.1                      |       |   |
|    |                  |         |        |   |      |     |       |      |     | Gene_Symbol=Snap91 Isoform Long        |       |   |
|    |                  |         |        |   |      |     |       |      |     | of Clathrin coat assembly protein      |       |   |
| 95 | SK.              | 1619.74 | -1.471 | 2 | 4.03 | 0.2 | 27/45 | 9.57 | MS2 | AP180                                  | 481.2 | 1 |
|    | .GSLPPAALESS#DST |         |        |   |      |     |       |      |     | IPI:IPI00326171.2                      |       |   |
|    |                  |         |        |   |      |     |       |      |     | Gene_Symbol=Camk2b                     |       |   |
|    |                  |         |        |   |      |     |       |      |     | calcium/calmodulin-dependent           |       |   |
|    |                  |         |        |   |      |     |       |      |     | protein kinase II beta subunit isoform |       |   |
| 96 | NTTIEDEDAK.      | 2528.09 | 0.220  | 2 | 4.03 | 0.1 | 25/69 | 3.40 | MS2 | 1                                      | 494.9 | 5 |
|    | .GDEDFQS#DSDSFNP |         |        |   |      |     |       |      |     | IPI:IPI00189777.5                      |       |   |
|    |                  |         |        |   |      |     |       |      |     | Gene_Symbol=Lrrc7 Isoform 1 of         |       |   |
|    |                  |         |        |   |      |     |       |      |     | Leucine-rich repeat-containing         |       |   |
| 97 | TLWEEQR.         | 2582.00 | -1.917 | 2 | 4.02 | 0.2 | 25/60 | 3.30 | MS2 | protein 7                              | 496.8 | 1 |
|    | .KFQEQECPPS#PEPT |         |        |   |      |     |       |      |     | IPI:IPI00190290.1                      |       |   |
|    |                  |         |        |   |      |     |       |      |     | Gene_Symbol=Rras2 Related RAS          |       |   |
|    |                  |         |        |   |      |     |       |      |     | viral (R-ras) oncogene homolog 2       | 485.1 | 1 |
| 98 | RK.              | 2037.91 | -1.327 | 3 | 3.96 | 0.2 | 39/90 | 6.50 | MS2 |                                        |       |   |
|    | .REDS#PGPEVQPM   |         |        |   |      |     |       |      |     | IPI:IPI00196677.1                      |       |   |
|    |                  |         |        |   |      |     |       |      |     | Gene_Symbol=Trim3 Tripartite           | 762.9 | 1 |
| 99 | K.               | 1664.70 | 0.267  | 2 | 3.91 | 0.3 | 25/39 | 4.11 | MS2 |                                        |       |   |

|     |                   |         |        |   |      |     |        |      |     |                                                                                    |                                                 |   |  |
|-----|-------------------|---------|--------|---|------|-----|--------|------|-----|------------------------------------------------------------------------------------|-------------------------------------------------|---|--|
|     | .QQISELERQKQDLES  |         |        |   |      |     |        |      |     |                                                                                    | motif-containing protein 3<br>IPI:IPI00370405.4 |   |  |
| 100 | #R.               | 2066.99 | -1.256 | 2 | 3.89 | 0.2 | 25/45  | 4.70 | MS2 | Gene_Symbol=Myo5c myosin VC<br>IPI:IPI00210881.1                                   | 1637.2                                          | 1 |  |
|     | .APEGEETEFYVS#PE  |         |        |   |      |     |        |      |     | Gene_Symbol=Dnajc5 DnaJ homolog<br>subfamily C member 5<br>IPI:IPI00766645.2       | 291.2                                           | 1 |  |
| 101 | DLEAQLQSDER.      | 2948.24 | -0.592 | 2 | 3.85 | 0.2 | 19/72  | 3.32 | MS2 | Gene_Symbol=Saps3 similar to<br>SAPS domain family, member 3<br>IPI:IPI00212320.1  | 424.8                                           | 2 |  |
|     | .IQQFDDGGS#DEEDI  |         |        |   |      |     |        |      |     | Gene_Symbol=Gap43 Neuromodulin<br>IPI:IPI00359851.3                                | 609.8                                           | 6 |  |
| 102 | WEEK.             | 2219.87 | 0.548  | 2 | 3.83 | 0.3 | 25/51  | 3.26 | MS2 | Gene_Symbol=Jph3 junctophilin 3<br>IPI:IPI00193828.1                               | 597.9                                           | 1 |  |
|     | .ATT#DNSPSSKAED   |         |        |   |      |     |        |      |     | Gene_Symbol=Fxyd1<br>Phospholemman precursor<br>IPI:IPI00373419.2                  | 371.6                                           | 1 |  |
| 103 | GPAKEEPK.         | 2238.98 | -0.897 | 3 | 3.82 | 0.2 | 38/120 | 4.33 | MS2 | Gene_Symbol=Spnb2<br>Non-erythrocyte beta-spectrin<br>IPI:IPI00372009.3            | 243.7                                           | 6 |  |
|     | .SLPVALES#DEETGD  |         |        |   |      |     |        |      |     | Gene_Symbol=Map1b<br>microtubule-associated protein 1b<br>IPI:IPI00476991.1        | 589.8                                           | 1 |  |
| 104 | ELK.              | 1911.85 | -0.969 | 2 | 3.81 | 0.2 | 22/48  | 3.47 | MS2 | Gene_Symbol=Ncam1 Neural cell<br>adhesion molecule 1, 140 kDa<br>isoform precursor | 290.9                                           | 2 |  |
|     | .TGEPDEEEGTFRSS#I |         |        |   |      |     |        |      |     |                                                                                    |                                                 |   |  |
| 105 | R.                | 1889.79 | -1.708 | 2 | 3.81 | 0.1 | 28/45  | 4.05 | MS2 |                                                                                    |                                                 |   |  |
|     | .GDQVSQNGLPAEQG   |         |        |   |      |     |        |      |     |                                                                                    |                                                 |   |  |
| 106 | S#PR.             | 1819.80 | -1.281 | 2 | 3.79 | 0.3 | 20/48  | 4.11 | MS2 |                                                                                    |                                                 |   |  |
|     | .VQSLEGEKLS#PK.   |         |        |   |      |     |        |      |     |                                                                                    |                                                 |   |  |
| 107 | .                 | 1394.69 | -1.590 | 2 | 3.79 | 0.3 | 24/33  | 7.09 | MS2 |                                                                                    |                                                 |   |  |
|     | .AAFS#KDESKEPIVE  |         |        |   |      |     |        |      |     |                                                                                    |                                                 |   |  |
| 108 | VR.               | 1884.91 | 0.086  | 2 | 3.77 | 0.4 | 25/45  | 4.70 | MS2 |                                                                                    |                                                 |   |  |

|     |                    |         |        |   |      |     |       |      |     |                                                                               |        |     |
|-----|--------------------|---------|--------|---|------|-----|-------|------|-----|-------------------------------------------------------------------------------|--------|-----|
|     | .NPPQDYES#DDESY    |         |        |   |      |     |       |      |     | IPI:IPI00370695.2                                                             |        |     |
| 109 | EVLDLTEYAR.        | 2925.20 | -0.679 | 2 | 3.75 | 0.1 | 24/69 | 3.26 | MS2 | Gene_Symbol=Fundc1 FUN14                                                      | 407.5  | 1   |
|     | .EQQEQLS#FQQTPID   |         |        |   |      |     |       |      |     | IPI:IPI00202684.1                                                             |        |     |
| 110 | R.                 | 1926.86 | -1.264 | 2 | 3.74 | 0.1 | 18/42 | 3.87 | MS2 | Gene_Symbol=Tank TANK protein                                                 | 296.3  | 112 |
|     | .SSSS#SSGVGSPAV    |         |        |   |      |     |       |      |     | IPI:IPI00187782.2                                                             |        |     |
| 111 | TPTEK.             | 1831.80 | -0.357 | 2 | 3.65 | 0.1 | 24/54 | 6.74 | MS2 | Gene_Symbol=Srgap3 similar to<br>SLIT-ROBO Rho GTPase-activating<br>protein 3 | 1039.5 | 2   |
|     | .LDKDGIPVSS#EAER   |         |        |   |      |     |       |      |     | IPI:IPI00569865.1                                                             |        |     |
| 112 | .                  | 1595.73 | -1.574 | 2 | 3.61 | 0.1 | 23/39 | 4.11 | MS2 | Gene_Symbol=Ergic3 44 kDa protein                                             | 1058.2 | 1   |
|     | .T#AKDSDDDDDDVTV   |         |        |   |      |     |       |      |     | IPI:IPI00324381.5                                                             |        |     |
| 113 | TVDRDR.            | 2217.91 | -0.355 | 2 | 3.61 | 0.4 | 30/54 | 3.69 | MS2 | Gene_Symbol=Stx1a Syntaxin-1A                                                 | 558.7  | 2   |
|     | .TSFSVGS#DDELGPI   |         |        |   |      |     |       |      |     | IPI:IPI00198211.2                                                             |        |     |
| 114 | R.                 | 1659.73 | -0.316 | 2 | 3.59 | 0.2 | 26/42 | 3.74 | MS2 | Gene_Symbol=Grlf1 Glucocorticoid<br>receptor DNA-binding factor 1             | 975.9  | 1   |
|     | .ASAAEGSEAS#PPSL   |         |        |   |      |     |       |      |     | IPI:IPI00358407.1                                                             |        |     |
| 115 | R.                 | 1509.66 | -0.394 | 2 | 3.58 | 0.2 | 27/42 | 4.31 | MS2 | Gene_Symbol=Kbtbd11 kelch repeat<br>and BTB (POZ) domain containing<br>11     | 979.7  | 1   |
|     | .AGEQQLS#EPEDME    |         |        |   |      |     |       |      |     | IPI:IPI00372303.3                                                             |        |     |
| 116 | MEAGDTDDPPR.       | 2727.04 | -1.026 | 2 | 3.55 | 0.4 | 27/69 | 3.23 | MS2 | Gene_Symbol=Usp7 Ubiquitin<br>carboxyl-terminal hydrolase 7                   | 404.4  | 1   |
|     | .TASLTSAAAS#IDGSR. |         |        |   |      |     |       |      |     | IPI:IPI00326606.4                                                             |        |     |
| 117 | .                  | 1416.64 | -0.085 | 2 | 3.54 | 0.1 | 27/39 | 6.50 | MS2 | Gene_Symbol=Ndr2 Isoform 2 of<br>Protein NDRG2                                | 1232.8 | 1   |

|     |                   |         |        |   |      |     |       |      |     |                                    |       |    |
|-----|-------------------|---------|--------|---|------|-----|-------|------|-----|------------------------------------|-------|----|
|     | .DSGSDEDFLMEDDD   |         |        |   |      |     |       |      |     | IPI:IPI00189138.1                  |       |    |
|     |                   |         |        |   |      |     |       |      |     | Gene_Symbol=Nucks1 Nuclear         |       |    |
|     |                   |         |        |   |      |     |       |      |     | ubiquitous casein and              |       |    |
| 118 | DS#DYGSSK.        | 2508.84 | -0.003 | 2 | 3.54 | 0.2 | 24/63 | 3.06 | MS2 | cyclin-dependent kinases substrate | 442.5 | 1  |
|     |                   |         |        |   |      |     |       |      |     | DECOY_IPI:IPI00567584.2            |       |    |
|     |                   |         |        |   |      |     |       |      |     | Gene_Symbol=LOC501388 similar      |       |    |
| 119 | .LEVRKS#IQLELIK.  | 1648.94 | -1.476 | 2 | 3.49 | 0.1 | 23/36 | 9.89 | MS2 | to Protein C9orf79                 | 292.1 | 6  |
|     |                   |         |        |   |      |     |       |      |     | IPI:IPI00193828.1                  |       |    |
|     | .TGEPDEEEGTFRSS#I |         |        |   |      |     |       |      |     | Gene_Symbol=Fxyd1                  |       |    |
| 120 | R.                | 1889.79 | -0.604 | 2 | 3.47 | 0.1 | 26/45 | 4.05 | MS2 | Phospholemman precursor            | 422.4 | 2  |
|     |                   |         |        |   |      |     |       |      |     | IPI:IPI00365435.4                  |       |    |
|     | .NTPQLWSVPS#ELL   |         |        |   |      |     |       |      |     | Gene_Symbol=LOC683446 38 kDa       |       |    |
| 121 | K.                | 1691.84 | -1.454 | 2 | 3.47 | 0.1 | 17/39 | 6.55 | MS2 | protein                            | 198.0 | 87 |
|     |                   |         |        |   |      |     |       |      |     | IPI:IPI00372009.3                  |       |    |
|     | .TTRS#PDTSAYCYET  |         |        |   |      |     |       |      |     | Gene_Symbol=Map1b                  |       |    |
| 122 | MEK.              | 2119.83 | -1.903 | 2 | 3.43 | 0.1 | 25/48 | 4.49 | MS2 | microtubule-associated protein 1b  | 330.2 | 1  |
|     |                   |         |        |   |      |     |       |      |     | IPI:IPI00203725.2                  |       |    |
|     | .KLEKEEEEGISQES#  |         |        |   |      |     |       |      |     | Gene_Symbol=Hmga1 Isoform          |       |    |
| 123 | SEEEQ.            | 2316.96 | -0.283 | 2 | 3.40 | 0.1 | 27/54 | 3.76 | MS2 | HMG-I of High mobility group       |       |    |
|     |                   |         |        |   |      |     |       |      |     | protein HMG-I/HMG-Y                | 307.1 | 1  |
|     |                   |         |        |   |      |     |       |      |     | IPI:IPI00358275.3                  |       |    |
|     | .SHS#SPSLNPDASPV  |         |        |   |      |     |       |      |     | Gene_Symbol=Psd3 similar to        |       |    |
| 124 | TAK.              | 1774.80 | -0.022 | 2 | 3.40 | 0.1 | 22/48 | 7.59 | MS2 | Pleckstrin and Sec7 domain         |       |    |
|     |                   |         |        |   |      |     |       |      |     | containing protein 3               | 311.0 | 2  |
|     | .TIKS#PCDSGYSETI  |         |        |   |      |     |       |      |     | IPI:IPI00372009.3                  |       |    |
| 125 | EK.               | 2057.88 | -0.548 | 2 | 3.39 | 0.2 | 19/48 | 4.49 | MS2 | Gene_Symbol=Map1b                  | 254.6 | 17 |

|     |                   |         |        |   |      |     |       |      |     |                                                               |        |     |
|-----|-------------------|---------|--------|---|------|-----|-------|------|-----|---------------------------------------------------------------|--------|-----|
|     |                   |         |        |   |      |     |       |      |     | microtubule-associated protein 1b                             |        |     |
|     | .IYQFPDCDS#DEDED  |         |        |   |      |     |       |      |     | IPI:IPI00421642.1                                             |        |     |
| 126 | FK.               | 2102.76 | -0.591 | 2 | 3.31 | 0.2 | 24/45 | 3.25 | MS2 | Gene_Symbol=Sept4 Septin                                      | 575.2  | 1   |
|     | .T#PGPLSSQGAPVDT  |         |        |   |      |     |       |      |     | IPI:IPI00210153.3                                             |        |     |
| 127 | QPAAQK.           | 2029.96 | -0.533 | 2 | 3.29 | 0.3 | 21/57 | 6.50 | MS2 | Gene_Symbol=Synj1 similar to<br>Synaptojanin-1                | 412.6  | 2   |
|     | .KEES#EESDDDM*G   |         |        |   |      |     |       |      |     | IPI:IPI00188804.1                                             |        |     |
| 128 | FGLFD.            | 2045.72 | -1.725 | 2 | 3.29 | 0.2 | 18/48 | 3.25 | MS2 | Gene_Symbol=Rplp2 60S acidic<br>ribosomal protein P2          | 438.7  | 3   |
|     | .DTDAYSDLS#DGEK   |         |        |   |      |     |       |      |     | IPI:IPI00213940.3                                             |        |     |
| 129 | EAR.              | 1851.73 | -0.546 | 2 | 3.28 | 0.2 | 25/45 | 3.73 | MS2 | Gene_Symbol=Fam131b Protein<br>FAM131B                        | 333.7  | 1   |
|     | .TGEPDEEEGTFRS#SI |         |        |   |      |     |       |      |     | IPI:IPI00193828.1                                             |        |     |
| 130 | R.                | 1889.79 | -0.534 | 2 | 3.27 | 0.2 | 26/45 | 4.05 | MS2 | Gene_Symbol=Fxyd1<br>Phospholemman precursor                  | 334.0  | 3   |
|     | .SAS#ADNLILPR.    |         |        |   |      |     |       |      |     | IPI:IPI00364913.2                                             |        |     |
| 131 | .VDPSLMEDS#DDGP   | 1236.60 | -0.521 | 2 | 3.25 | 0.1 | 23/30 | 6.55 | MS2 | Gene_Symbol=Ccny similar to cyclin<br>fold protein 1          | 1124.5 | 3   |
| 132 | SLPTK.            | 1982.83 | 0.422  | 2 | 3.23 | 0.2 | 24/51 | 3.39 | MS2 | IPI:IPI00202231.1<br>Gene_Symbol=Rer1 Protein RER1            | 796.4  | 1   |
|     | .AIS#LEGEPR.      |         |        |   |      |     |       |      |     | IPI:IPI00327448.1                                             |        |     |
| 133 | .FLLQHQADVNAKT#   | 1051.48 | -0.769 | 2 | 3.22 | 0.3 | 20/24 | 4.31 | MS2 | Gene_Symbol=Dlg2 Isoform 1 of<br>Disks large homolog 2        | 788.2  | 2   |
| 134 | K.                | 1692.85 | -0.857 | 2 | 3.22 | 0.1 | 19/39 | 9.67 | MS2 | IPI:IPI00767980.2<br>Gene_Symbol=Ank1 ankyrin 1,<br>erythroid | 205.3  | 121 |



|     |        |                   |         |        |   |      |     |       |      |     |                                                                                                           |       |    |
|-----|--------|-------------------|---------|--------|---|------|-----|-------|------|-----|-----------------------------------------------------------------------------------------------------------|-------|----|
| 135 | R.     | .SGYSSPGS#PGTPGS  | 1473.60 | 0.048  | 2 | 3.17 | 0.1 | 20/42 | 9.65 | MS2 | IPI:IPI00230972.2<br>Gene_Symbol=Mapt Isoform Tau-E<br>of Microtubule-associated protein tau              | 523.4 | 1  |
| 136 | K.     | .DSGSSSVFAES#PGG  | 1491.60 | -0.585 | 2 | 3.15 | 0.1 | 28/42 | 4.11 | MS2 | IPI:IPI00190619.3<br>Gene_Symbol=Snip 135 kDa protein<br>DECOY_IPI:IPI00364960.1<br>Gene_Symbol=Kif20a    | 677.8 | 1  |
| 137 | .      | .EQIQEQY#FTTLSEK. | 1823.81 | -1.337 | 2 | 3.12 | 0.2 | 18/39 | 4.01 | MS2 | Kif20a_predicted protein<br>IPI:IPI00203158.3<br>Gene_Symbol=Stub1 STIP1<br>homology and U-Box containing | 222.2 | 42 |
| 138 | AQELK. | .LGTGGGGS#PDKSPS  | 1865.86 | -1.513 | 2 | 3.11 | 0.4 | 23/54 | 7.01 | MS2 | protein 1<br>IPI:IPI00209824.2<br>Gene_Symbol=Camk2b<br>Calmodulin-dependent protein kinase               | 168.3 | 12 |
| 139 | AK.    | .ESSDST#NTTIEDED  | 1821.69 | 0.113  | 2 | 3.08 | 0.2 | 21/45 | 3.40 | MS2 | II beta M isoform                                                                                         | 453.3 | 4  |

# Phosphorylation Site
